# Supplementary material
Source: PubMed Central journal article supplement (PMC3051243)
Supplement: tpc.110.079269_1.pdf [file tpc.110.079269_1.pdf]

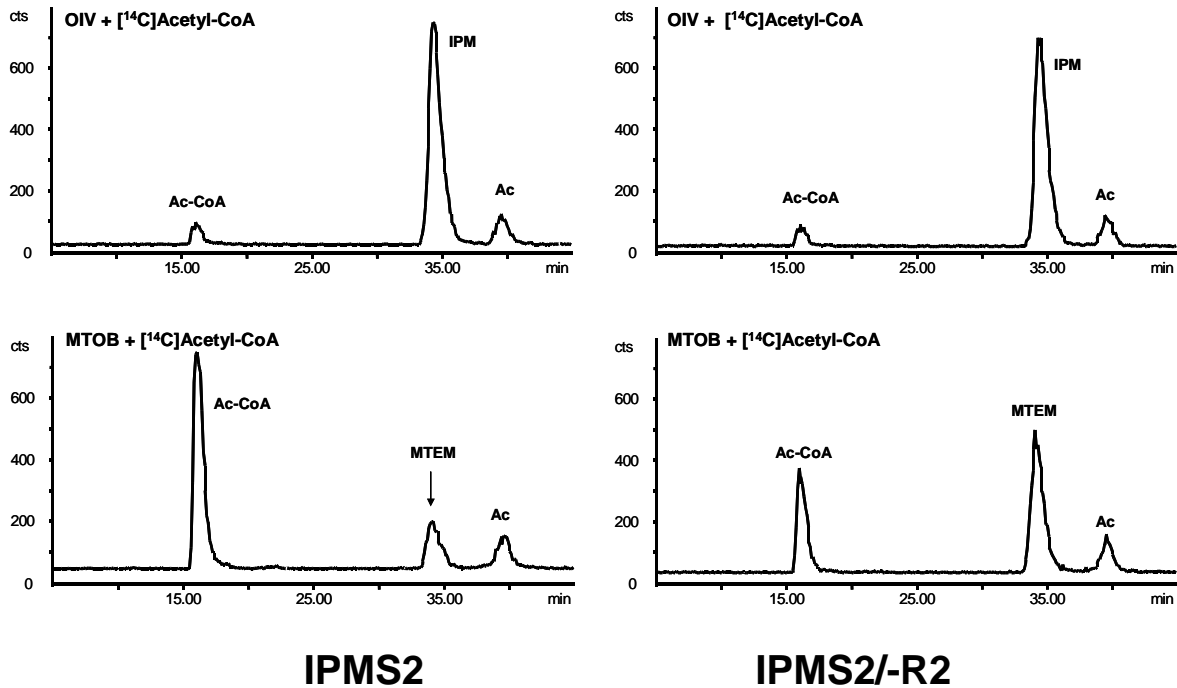

**Supplemental Figure 1. Radio-HPLC traces of assays of *A. thaliana* IPMS2 and IPMS2 modified to remove the C-terminal regulatory domain (IPMS2/-R2).** The modified enzyme shows increased activity for the MAM substrate in the condensation reaction with [<sup>14</sup>C]acetyl-CoA. Both enzymes catalyse the conversion of the IPMS substrate, 2-oxoisovalerate (OIV) to [<sup>14</sup>C]-isopropylmalate (IPM) in good yield, but IPMS2/-R2 has an increased product peak for reaction with 4-methylthio-2-oxobutyrate (MTOB) to give [<sup>14</sup>C]2-(2'-methylthio)ethylmalate (MTEM). Assays were performed with 1 mM [<sup>14</sup>C]acetyl-CoA (Ac-CoA), 6 mM 2-oxoalkanoate and 27.5 µg enzyme for 1 h at 30°C.

**Supplemental Table 1.** Oligonucleotide primers used in this study

| Name                              | Sequence (5'→3') <sup>a</sup>                          | Purpose <sup>b</sup>                                                                                                                                                                                                        |
|-----------------------------------|--------------------------------------------------------|-----------------------------------------------------------------------------------------------------------------------------------------------------------------------------------------------------------------------------|
| 1ipms1i+atg <sup>c</sup>          | ATGTGCTCAATCTCAGATCCTTCTC                              | F, Construction of IPMS1/-R1.                                                                                                                                                                                               |
| ipms1-short <sup>d</sup>          | TTCATCAGATACTAAAGCTATTATGTCCGC                         | R, Construction of IPMS1/-R1.                                                                                                                                                                                               |
| 1ipms2m+atg <sup>c</sup>          | ATGCTTACCACCGCCGAAAATT                                 | F, Construction of IPMS2/-R2;<br>SOEing first part of IPMS2/PS00816 <sub>MAM</sub><br>and IPMS2/-R2/PS00816 <sub>MAM</sub> ;<br>Third PCR in SOEing IPMS2/PS00816 <sub>MAM</sub><br>and IPMS2/-R2/ PS00816 <sub>MAM</sub> . |
| ipms2-short <sup>d</sup>          | ATCAGATACTAAAGCTATTAAGTCAGCATCG                        | R, Construction of IPMS2/-R2;<br>SOEing second half of<br>IPMS2/-R2/PS00816 <sub>MAM</sub><br>Third PCR in SOEing of<br>IPMS2/-R2/PS00816 <sub>MAM</sub>                                                                    |
| mam1x <sup>ff</sup> <sup>d</sup>  | ATGGGTTGCTCTTCTGTGTCC                                  | F, SOEing MAM1 part of MAM1/+R2;<br>Third PCR in SOEing of MAM1/+R2.                                                                                                                                                        |
| mam1+sttipms2 <sup>d</sup>        | cagacagcctctggctgaaaTTCATCGCTAGATGTTA<br>CTAATGCC      | R, SOEing MAM1 part of MAM1/+R2.                                                                                                                                                                                            |
| ipms2+sttmam1 <sup>d</sup>        | attagtaacatcagcatgaaTTTCAGCCAGAGGCTGTCTG               | F, SOEing R2-part of MAM1/+R2.                                                                                                                                                                                              |
| 2ipms2n <sup>c</sup>              | GGCAGGGACTTCGTTGGTC                                    | R, SOEing R2-part of MAM1/+R2 and<br>MAM3/+R2;<br>Third PCR of SOEing MAM1/+R2 and<br>MAM3/+R3;<br>SOEing second part IPMS2/ PS00816 <sub>MAM</sub> ;<br>Third PCR in SOEing IPMS2/PS00816 <sub>MAM</sub> .                 |
| mam3ex <sup>ff</sup> <sup>d</sup> | ATGGCTGAGTCCAAAAAGGTGGC                                | F, SOEing MAM3 part of MAM3/+R2;<br>Third PCR in SOEing of MAM3/+R2.                                                                                                                                                        |
| mam3+sttipms2 <sup>d</sup>        | cagacagcctctggctgaaaTTCAGCACCGTTCACCACT                | R, SOEing MAM3 part of MAM3/+R2.                                                                                                                                                                                            |
| ipms2+sttmam3 <sup>d</sup>        | agtggtaacggctgctgaaTTTCAGCCAGAGGCTGTCTG                | F, SOEing R2-part of MAM3/+R2.                                                                                                                                                                                              |
| ipms2-mn-rv <sup>d</sup>          | caagaccaagtcggttgacaatgaacagcGATTATAACATTTT<br>GGATC   | R, SOEing first part IPMS2/PS00816 <sub>MAM</sub><br>and IPMS2/-R2/PS00816 <sub>MAM</sub> .                                                                                                                                 |
| ipms2_mn_for <sup>d</sup>         | gctgttcattgtcacaacgaccttggtcttgCCACCGCCAAC<br>ACTTTATC | F, SOEing second part IPMS2/PS00816 <sub>MAM</sub><br>and IPMS2/-R2/PS00816 <sub>MAM</sub>                                                                                                                                  |
| H167L-for <sup>d</sup>            | GCTAAGCGGCCAAGAATCCTTACGTTTATT<br>GCCACTAG             | F, Point mutation primer.                                                                                                                                                                                                   |
| H167L-rev <sup>d</sup>            | CTAGTGGCAATAAACGTAAGGATTCTTGGC<br>CGCTTAGC             | R, Point mutation primer.                                                                                                                                                                                                   |
| S216G-for <sup>d</sup>            | GTGAAGATGTTGAATTTGGTCCAGAAGAT<br>GCCGGAAGATCG          | F, Point mutation primer.                                                                                                                                                                                                   |
| S216G-rev <sup>d</sup>            | CGATCTTCCGGCATCTTCTGGACCAAATTC<br>AACATCTTCAC          | R, Point mutation primer.                                                                                                                                                                                                   |
| L143I-for <sup>d</sup>            | GTCCCTGTAATCTGTGGTATCTCGAGATGT<br>AACAAG               | F, Point mutation primer.                                                                                                                                                                                                   |

---

|                             |                                                   |                           |
|-----------------------------|---------------------------------------------------|---------------------------|
| L143I-rev <sup>d</sup>      | CTTGTTACATCTCGAGATACCACAGATTAC<br>AGGGAC          | R, Point mutation primer. |
| P252G-for <sup>d</sup>      | GCTGGAGCAACCACTCTTAACATAGGTGA<br>CACTGTTGGTATAACC | F, Point mutation primer. |
| P252G-rev <sup>d</sup>      | GGTTATACCAACAGTGTACCTATGTTAAG<br>AGTGGTTGCTCCAGC  | R, Point mutation primer. |
| N250G/P252Gfor <sup>d</sup> | GCTGGAGCAACCACTCTTGGCATAGGTGA<br>CACTGTTGGTATAACC | F, Point mutation primer. |
| N250G/P252Grev <sup>d</sup> | GGTTATACCAACAGTGTACCTATGCCAAG<br>AGTGGTTGCTCCAGC  | R, Point mutation primer. |

---

<sup>a</sup>Lower case letters indicate the overhangs of primers used for gene SOEing

<sup>b</sup>R = reverse primer, F = forward primer

<sup>c</sup>Standard purified primers from JenaBioscience (Jena, Germany)

<sup>d</sup>HPLC purified primers synthesized by MWG (Ebersberg, Germany)
